# Supplementary material for: Lipid-dependence of target membrane stability during influenza viral fusion
Source: Oxford University Press journal article supplement (doi:10.1242/jcs.218321), 2018-07-02
Supplement: jcs218321supp.pdf [file jcs218321supp.pdf]

Table S1: Parameters of the fit (Fig. 3), are (to a first approximation) statistically the same using the 95% confidence bounds. However, there are differences in the goodness of fit parameters between the compositions containing POPC:POPE:TG (20 measurements) and POPC:DOG:TG (21 measurements) when compared with POPC:CHOL:POPE:TG (12 measurements) and POPC:CHOL:TG (15 measurements). The fitting results are summarized.

| Lipid Compositions | Coefficients (with 95% confidence bound) |                   | Goodness of fit |                |                        |      |
|--------------------|------------------------------------------|-------------------|-----------------|----------------|------------------------|------|
|                    | a                                        | b                 | SSE             | R <sup>2</sup> | Reduced R <sup>2</sup> | RMSE |
| POPC:CHOL:POPE:TG  | 2.23 (1.89, 2.56)                        | 5.61 (3.81, 7.40) | 0.58            | 0.93           | 0.92                   | 0.24 |
| POPC:CHOL:TG       | 2.14 (1.78, 2.45)                        | 6.23 (4.36, 8.11) | 0.87            | 0.93           | 0.92                   | 0.26 |
| POPC:POPE:TG       | 1.90 (1.45, 2.36)                        | 4.55 (2.58, 6.53) | 2.27            | 0.76           | 0.75                   | 0.36 |
| POPC:DOG:TG        | 1.87 (1.40, 2.34)                        | 4.89 (2.82, 6.97) | 2.64            | 0.76           | 0.75                   | 0.37 |
| All data           | 1.99 (1.82, 2.16)                        | 5.18 (4.39, 5.97) | 5.04            | 0.88           | 0.87                   | 0.28 |
